# Supplementary material
Source: publisher figshare collection journal article supplement (https://sage.figshare.com/ndownloader/files/17868377)
Supplement: Supplementary file 1 [file 17868377]

Numerical simulation on Heat Extraction Performance of  
Enhanced Geothermal System under the Different Well layout

Yuanyuan Ma<sup>1,\*</sup>, Shibin Li<sup>1</sup>, Ligang Zhang<sup>1</sup>, Hao Li<sup>1</sup> and Zhaoyi Liu<sup>1</sup>

*1. Institute of Petroleum Engineering, Northeast Petroleum University, Daqing 163318, China*

Corresponding author:

Yuanyuan Ma, 99 Fazhan Road. Daqing of Heilongjiang Province, 163318, China

E-mail: mayuanyuan\_1991@outlook.com
